# Supplementary material for: Prognostic Evaluation of Neurological Assessment of the Neuro-Oncology Scale in Glioblastoma Patients
Source: PubMed Central journal article supplement — Brain Tumor Res Treat. 2018 Apr 2;6(1):22–30. doi: 10.14791/btrt.2018.6.e1 (PMC5932296; doi:10.14791/btrt.2018.6.e1), 2018-04-02
Supplement: btrt-6-22-s001.pdf [file btrt-6-22-s001.pdf]

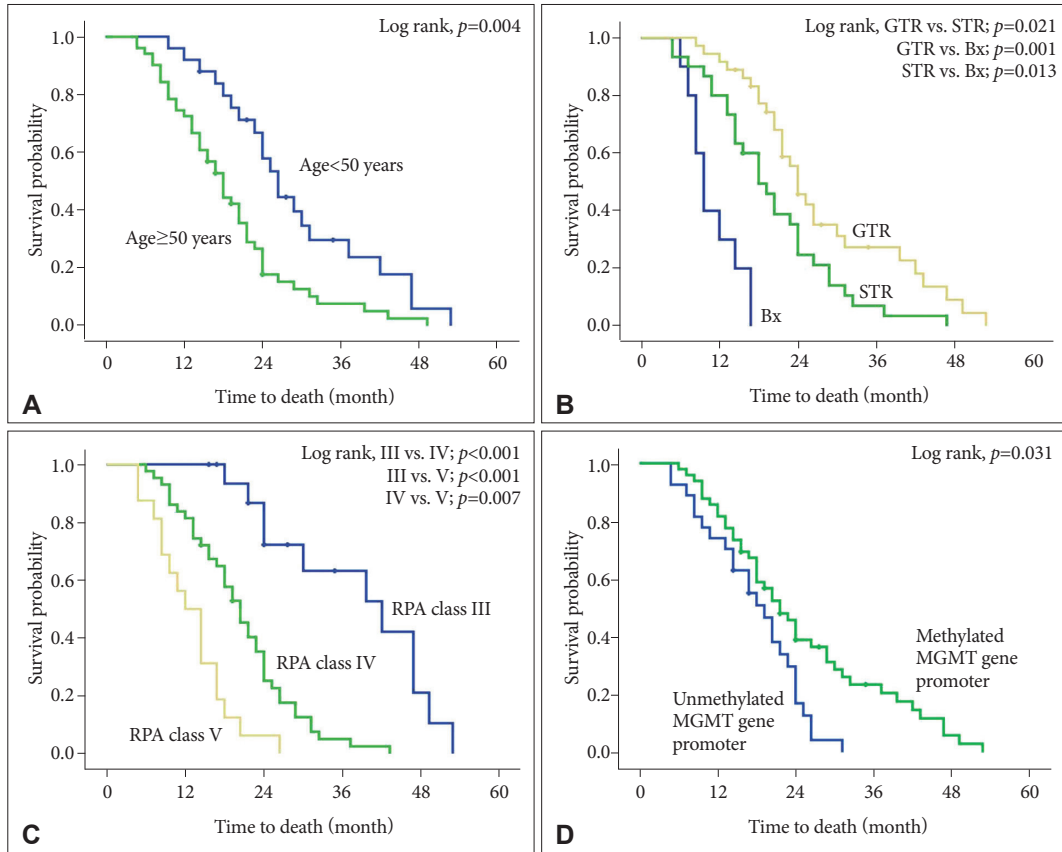

**Supplementary Fig. 1.** Kaplan-Meier survival curves according to the other meaningful factors associated with overall survivals. A: age (<50 years vs. ≥50 years). B: extent of resection (STR vs. GTR vs. Bx). C: RPA class (III vs. IV vs. V). D: methylation status of MGMT gene promoter (methylated vs. unmethylated). STR, subtotal resection; GTR, gross total resection; Bx, biopsy; RPA, recursive partitioning analysis; MGMT, O6-methyl guanine DNA methyltransferase.
